# Supplementary material
Source: Springer Nature journal article supplement (https://www.springermedizin.de/resource/supplementary/12889_2014_7409_MOESM2_ESM.pdf/9497268)

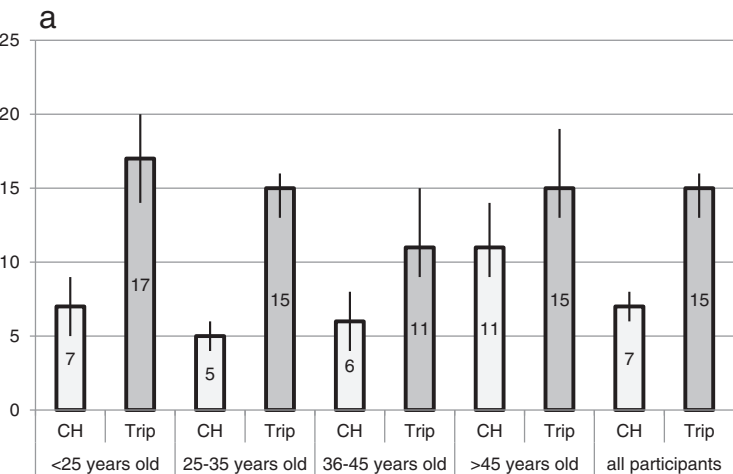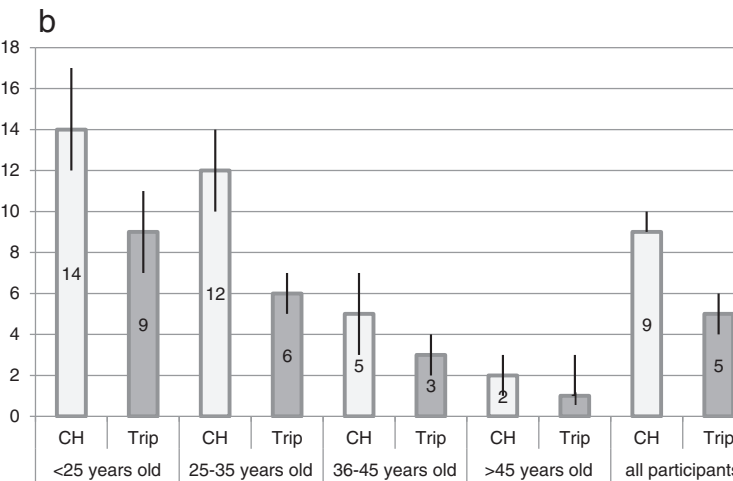

Supplement: MOESM2 [file 9497268]
